# Supplementary material
Source: PubMed Central journal article supplement (PMC6596424)
Supplement: NIHMS1005127-supplement-Supp_figS1-4.pdf [file NIHMS1005127-supplement-Supp_figS1-4.pdf]

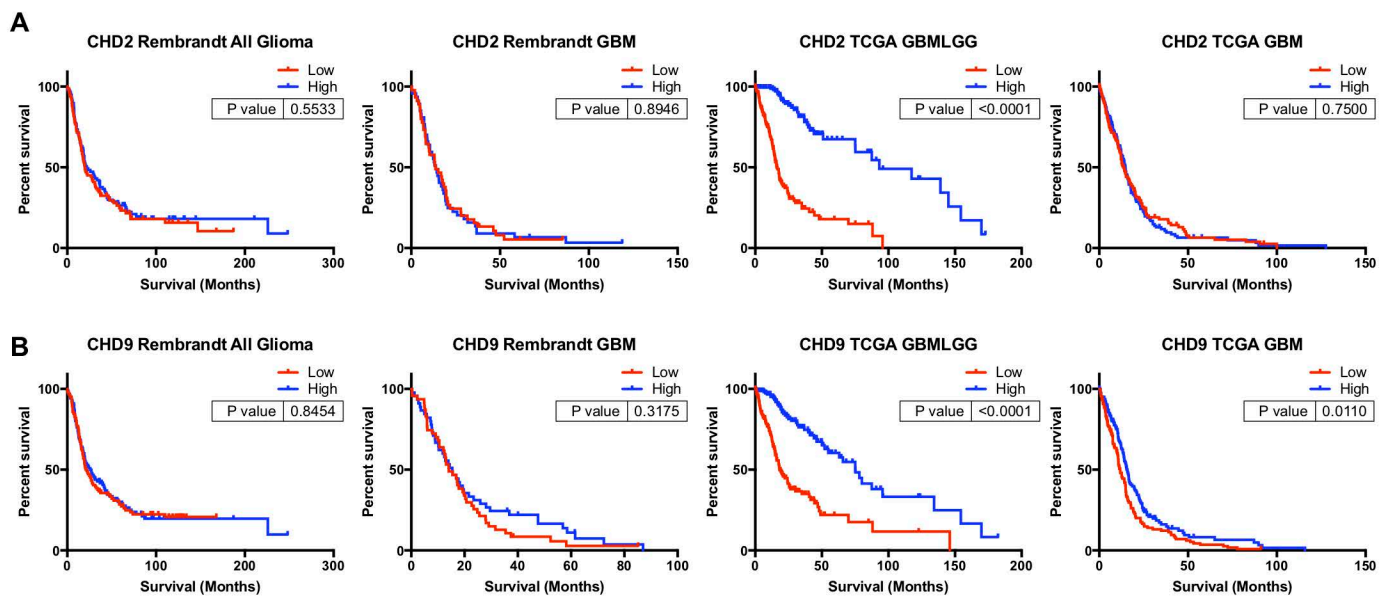

**Supplemental Figure S1. CHD2 and CDH9 Do not Consistently Correlate with Poor Glioma Patient Outcomes.** CHD family members **(A)** CHD2 and **(B)** CHD9 which were also downregulated by acidic stress in the initial screen were assessed for correlations with patient outcomes using REMBRANDT or TCGA data. P values for the indicated log rank survival curve comparisons are shown.

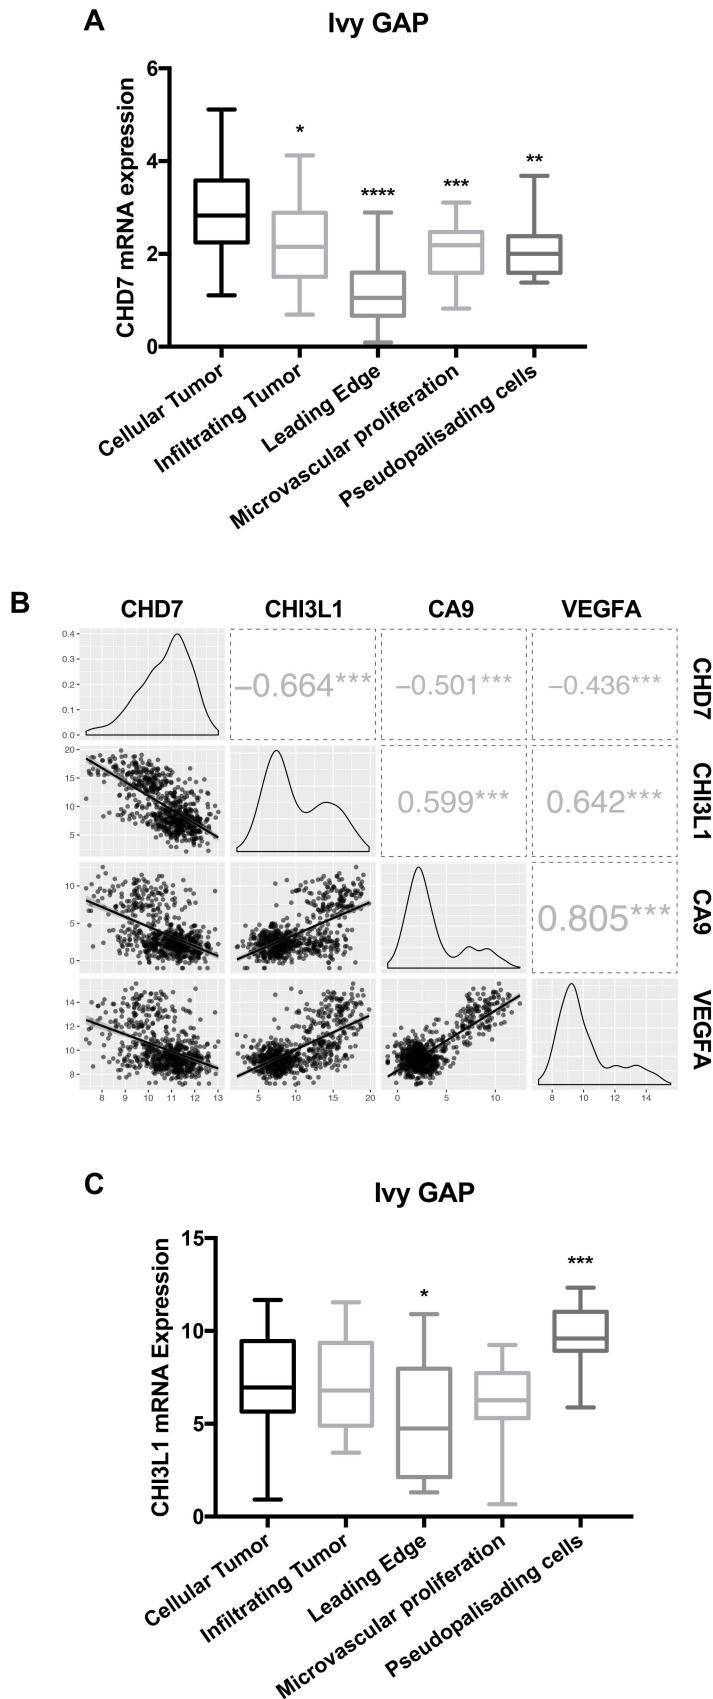

**Supplemental Figure S2. Levels of CHD7 and a Candidate Target Gene, CHI3L1, in Pseudopalisading Cells and Correlations with Hypoxia Target Genes. (A)** CHD7 mRNA levels in the Ivy GAP dataset indicate lower levels in pseudopalisading cells in comparisons to the more cellular tumor. **(B)** In silico analysis demonstrates expression of CHD7 in TCGA glioma patient samples with correlation coefficients for CHI3L1, CA9 or VEGFA. **(C)** CHI3L1 levels are elevated in pseudopalisading cells in the Ivy GAP dataset. \*,  $p < 0.05$ ; \*\*,  $p < 0.01$ ; \*\*\*,  $p < 0.001$ ; \*\*\*\*,  $p < 0.0001$  with ANOVA comparison to cellular tumor

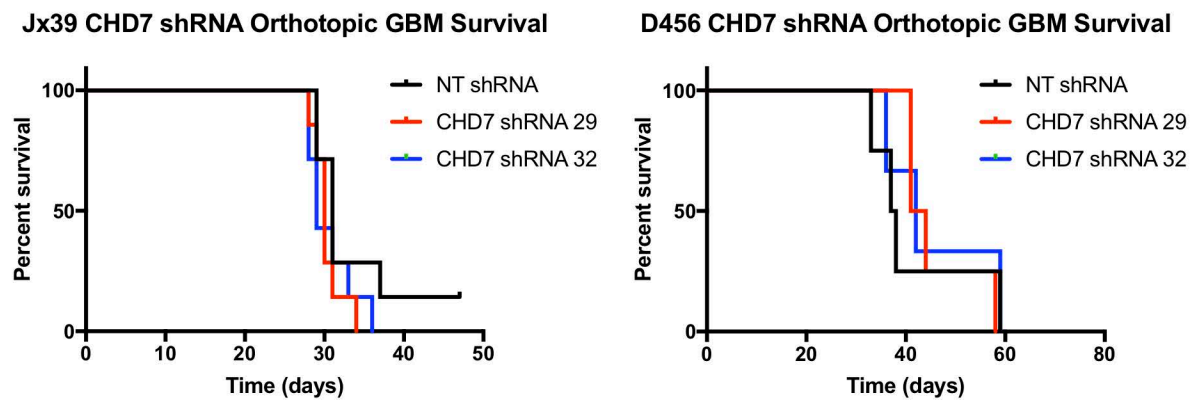

**Supplemental Figure S3. Screen for Chromatin Remodeling Genes Transcriptionally Regulated by Perinecrotic Microenvironments.** Jx39 and D456 GBM PDX were transduced with shRNA directed toward CHD7 or random non-targeting sequence and orthotopically implanted into mice. Survival curves generated from mice monitored until they reached a tumor burden that induced neurological signs. CHD7 shRNA did not significantly affect survival of these mice as compared to the non-targeting shRNA.

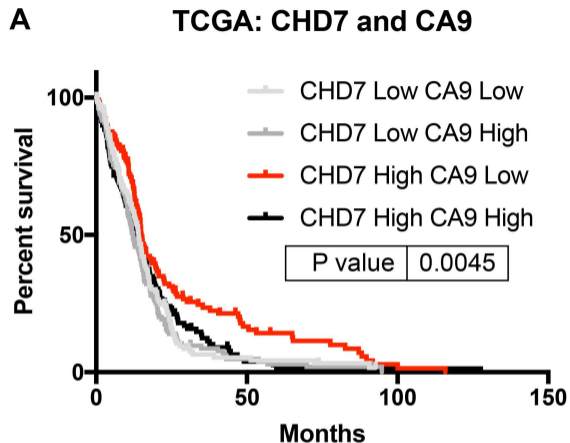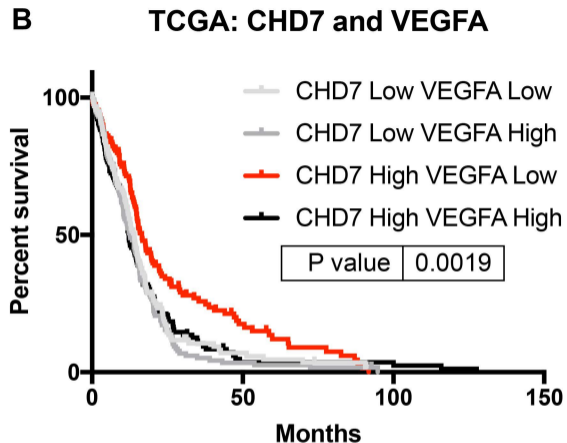

**Figure S4. CHD7 Co-Expression with the Hypoxia Target Genes CA9 or VEGF Correlates with Prognosis.** In silico analysis demonstrates expression of CHD7 in TCGA GBM patient samples stratified by CHD7 expression (low or high) and co-expressed with **(A)** CA9 or **(B)** VEGFA. P value shown for Log-rank Mantel-Cox test.
